# Supplementary material
Source: PubMed Central journal article supplement (PMC6624797)
Supplement: jamadermatol-155-1080-s001.pdf [file jamadermatol-155-1080-s001.pdf]

## Supplementary Online Content

Okiyama N, Yamaguchi Y, Koder M, et al. Distinct histopathologic patterns of finger eruptions in dermatomyositis based on myositis-specific autoantibody profiles. *JAMA Dermatol*. Published online July 10, 2019. doi:10.1001/jamadermatol.2019.1668

**eTable.** Clinical characteristics and histopathological classifications in the analyzed cases

**eFigure.** Histopathologic classification of skin eruptions in myositis-specific autoantibody-associated groups

This supplementary material has been provided by the authors to give readers additional information about their work.

**Supplementary Table 1.** Clinical characteristics and histopathological classifications in the analyzed cases.

| Autoantigen for Myositis-specific autoantibody | Sex | Age | Site of finger skin biopsy | Myositis | Interstitial lung disease | Malignancy      | Interface dermatitis | Psoriasiform dermatitis | Exematomous reaction | Vascular injury |
|------------------------------------------------|-----|-----|----------------------------|----------|---------------------------|-----------------|----------------------|-------------------------|----------------------|-----------------|
| ARS                                            | M   | 31  | Side                       | +        | None                      | None            |                      |                         |                      | +               |
| ARS                                            | M   | 41  | Side                       | +        | Chronic                   | None            |                      | +                       |                      | +               |
| ARS                                            | M   | 43  | Side                       | +        | Chronic                   | None            | +                    | +                       | +                    |                 |
| ARS                                            | M   | 46  | Rear                       | +        | None                      | None            | +                    | +                       | +                    |                 |
| ARS                                            | M   | 47  | Rear                       | +        | Chronic                   | None            | +                    | +                       |                      |                 |
| ARS                                            | M   | 48  | Side                       | None     | Chronic                   | None            | +                    | +                       | +                    |                 |
| ARS                                            | M   | 54  | Rear                       | +        | None                      | None            | +                    | +                       | +                    |                 |
| ARS                                            | M   | 54  | Rear                       | +        | Chronic                   | None            |                      |                         |                      |                 |
| ARS                                            | M   | 59  | Side                       | +        | Chronic                   | None            | +                    | +                       |                      |                 |
| ARS                                            | M   | 62  | Side                       | None     | Chronic                   | None            |                      |                         | +                    | +               |
| ARS                                            | M   | 65  | Side                       | None     | Chronic                   | None            | +                    | +                       | +                    | +               |
| ARS                                            | F   | 33  | Side                       | +        | Chronic                   | Uterine cancer  | +                    | +                       | +                    | +               |
| ARS                                            | F   | 45  | Side                       | +        | Chronic                   | None            | +                    | +                       | +                    | +               |
| ARS                                            | F   | 46  | Side                       | +        | None                      | None            |                      |                         |                      | +               |
| ARS                                            | F   | 48  | Side                       | None     | Chronic                   | None            | +                    | +                       | +                    |                 |
| ARS                                            | F   | 48  | Side                       | +        | Chronic                   | None            | +                    |                         | +                    | +               |
| ARS                                            | F   | 49  | Side                       | +        | Chronic                   | None            | +                    |                         | +                    |                 |
| AR                                             | F   | 54  | Rear                       | +        | Chronic                   | None            | +                    | +                       | +                    | +               |
| ARS                                            | F   | 56  | Side                       | +        | Chronic                   | None            |                      | +                       | +                    |                 |
| ARS                                            | F   | 58  | Rear                       | None     | None                      | Ovarian cancer  |                      |                         |                      |                 |
| ARS                                            | F   | 59  | Rear                       | +        | Chronic                   | None            | +                    |                         |                      |                 |
| ARS                                            | F   | 60  | Rear                       | +        | Chronic                   | Appendix cancer |                      |                         |                      | +               |
| ARS                                            | F   | 61  | Side                       | None     | Chronic                   | Breast cancer   |                      | +                       |                      |                 |
| ARS                                            | F   | 62  | Side                       | +        | Chronic                   | Breast cancer   | +                    |                         | +                    | +               |
| ARS                                            | F   | 63  | Rear                       | None     | Chronic                   | Breast cancer   |                      |                         |                      | +               |
| ARS                                            | F   | 68  | Rear                       | None     | Chronic                   | None            |                      |                         | +                    |                 |
| ARS                                            | F   | 68  | Rear                       | +        | Chronic                   | None            | +                    |                         | +                    |                 |
| ARS                                            | F   | 70  | Rear                       | +        | Chronic                   | None            | +                    | +                       |                      |                 |
| ARS                                            | F   | 72  | Rear                       | None     | Chronic                   | None            |                      | +                       |                      | +               |
| ARS                                            | F   | 75  | Side                       | None     | Chronic                   | None            | +                    | +                       | +                    |                 |
| MDA5                                           | M   | 49  | Rear                       | +        | Rapidly progressive       | None            | +                    |                         |                      | +               |
| MDA5                                           | M   | 57  | Rear                       | None     | Rapidly progressive       | None            |                      |                         |                      | +               |
| MDA5                                           | M   | 65  | Rear                       | +        | Rapidly progressive       | None            | +                    |                         |                      | +               |
| MDA5                                           | M   | 66  | Rear                       | +        | Rapidly progressive       | None            | +                    |                         |                      | +               |
| MDA5                                           | M   | 78  | Rear                       | None     | Rapidly progressive       | None            |                      |                         |                      |                 |
| MDA5                                           | F   | 44  | Rear                       | +        | Rapidly progressive       | None            | +                    |                         |                      | +               |
| MDA5                                           | F   | 56  | Rear                       | +        | Rapidly progressive       | None            |                      |                         |                      | +               |
| MDA5                                           | F   | 57  | Rear                       | None     | Rapidly progressive       | None            | +                    |                         |                      | +               |

|       |   |    |        |      |                     |                               |   |   |   |   |
|-------|---|----|--------|------|---------------------|-------------------------------|---|---|---|---|
| MDA5  | F | 49 | Rear   | None | Rapidly progressive | None                          | + |   |   | + |
| MDA5  | F | 69 | Rear   | None | Rapidly progressive | None                          | + |   |   | + |
| MDA5  | F | 63 | Flexor | None | Rapidly progressive | None                          | + |   |   |   |
| MDA5  | F | 57 | Rear   | +    | Rapidly progressive | None                          | + |   |   | + |
| MDA5  | F | 59 | Rear   | +    | Rapidly progressive | None                          | + |   |   | + |
| MDA5  | F | 62 | Rear   | None | Rapidly progressive | None                          |   |   | + |   |
| MDA5  | F | 44 | Flexor | None | Rapidly progressive | None                          |   |   |   | + |
| MDA5  | F | 62 | Rear   | None | Rapidly progressive | None                          | + |   |   | + |
| MDA5  | F | 45 | Rear   | +    | Rapidly progressive | None                          | + |   |   | + |
| MDA5  | F | 54 | Rear   | None | Rapidly progressive | None                          |   | + | + |   |
| MDA5  | F | 16 | Rear   | +    | Rapidly progressive | none                          |   |   | + |   |
| TIF1γ | M | 42 | Rear   | +    | None                | None                          | + |   |   | + |
| TIF1γ | M | 62 | Rear   | +    | None                | None                          |   |   |   |   |
| TIF1γ | M | 63 | Rear   | +    | None                | Lung cancer                   | + |   |   | + |
| TIF1γ | M | 69 | Rear   | +    | None                | Pharyngeal cancer             | + |   |   |   |
| TIF1γ | M | 69 | Rear   | +    | None                | Lung cancer                   | + |   |   | + |
| TIF1γ | M | 73 | Rear   | None | None                | None                          | + |   |   | + |
| TIF1γ | M | 75 | Rear   | None | None                | Esophageal cancer             |   |   |   | + |
| TIF1γ | M | 76 | Rear   | +    | None                | Lung cancer                   | + |   | + |   |
| TIF1γ | M | 79 | Rear   | +    | None                | Lung cancer                   |   |   |   |   |
| TIF1γ | F | 34 | Rear   | None | None                | None                          | + |   |   | + |
| TIF1γ | F | 35 | Rear   | None | None                | None                          | + |   |   |   |
| TIF1γ | F | 37 | Rear   | +    | None                | None                          |   |   |   |   |
| TIF1γ | F | 39 | Rear   | None | None                | None                          | + |   |   |   |
| TIF1γ | F | 42 | Rear   | +    | None                | None                          |   |   |   | + |
| TIF1γ | F | 47 | Rear   | +    | None                | Ovarian cancer, Breast cancer |   |   |   | + |
| TIF1γ | F | 51 | Rear   | +    | None                | Breast cancer                 | + |   |   |   |
| TIF1γ | F | 54 | Rear   | +    | None                | Breast cancer                 | + |   |   |   |
| TIF1γ | F | 60 | Flexor | +    | None                | Colon cancer                  |   |   |   |   |
| TIF1γ | F | 63 | Rear   | +    | None                | Gastric cancer                | + |   |   |   |
| TIF1γ | F | 65 | Rear   | +    | None                | None                          |   |   |   |   |
| TIF1γ | F | 67 | Rear   | None | None                | None                          |   |   |   | + |
| TIF1γ | F | 69 | Rear   | +    | None                | Gastric cancer                | + |   |   | + |
| TIF1γ | F | 74 | Rear   | +    | None                | Breast cancer                 | + | + |   |   |
| TIF1γ | F | 83 | Rear   | +    | None                | None                          | + |   |   | + |
| TIF1γ | F | 88 | Flexor | None | None                | None                          |   |   |   |   |

M, Male; F, Female

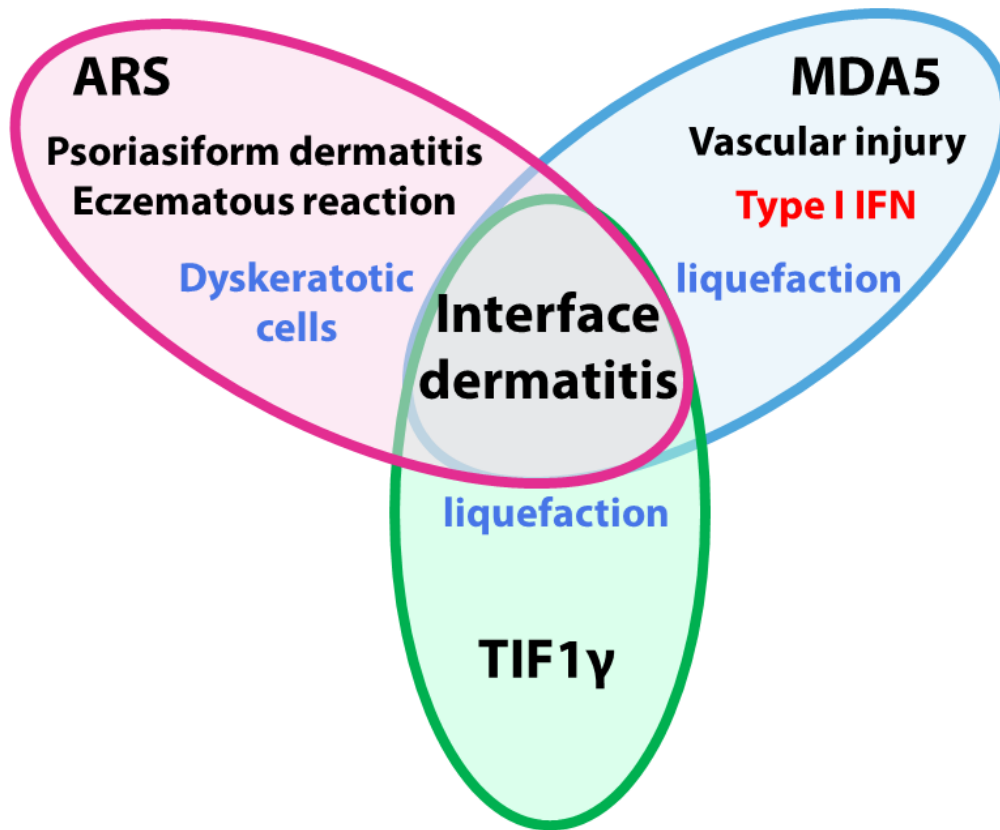

**Supplementary Figure 1. Histopathological classification of skin eruptions in myositis-specific autoantibody-associated groups.** Anti-ARS antibody-associated DM group is characterized by a mixture of psoriasiform dermatitis and eczematous reaction with interface dermatitis mainly presenting dyskeratotic cells, and absent epidermal expression of MxA. Vascular injury in the upper dermis and a whole epidermal expression of MxA are observed especially in anti-MDA5 antibody-associated DM group.
